# Supplementary material for: Human microbiota modulation via QseC sensor kinase mediated in the Escherichia coli O104:H4 outbreak strain infection in microbiome model
Source: PubMed Central journal article supplement (PMC8170955; doi:10.1186/s12866-021-02220-3), 2021-06-02
Supplement: 12866_2021_2220_MOESM1_ESM.pdf [file 12866_2021_2220_MOESM1_ESM.pdf]

### C227-11 growth curves

$p < 0,0001$  (\*\*\*)

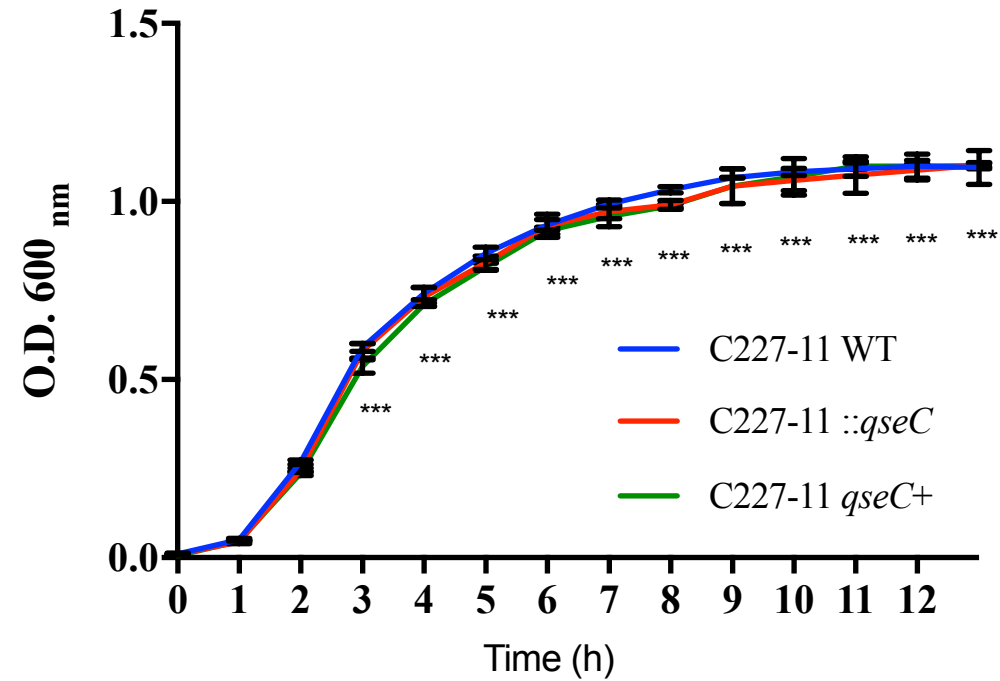

**Sup. Mat. 1** Growth curve of the E. coli C227-11 strain in LB media
